# Supplementary material
Source: PubMed Central journal article supplement (PMC7032821)

# Supplement

## Approval of psychotherapy and medication for the treatment of mental disorders over the life span. An Age Period Cohort analysis.

### Vignette schizophrenia

Imagine that you hear the following about an acquaintance with whom you occasionally spend your leisure time:

Within the past months, your acquaintance appears to have changed. More and more, he retreated from his friends and colleagues, up to the point of avoiding them. If someone managed to involve him in a conversation, he would address only one single topic: the question whether some people had the natural gift of reading other people's thoughts. This question became his sole concern. In contrast with his previous habits, he stopped taking care of his appearance and looked increasingly untidy. At work, he seemed absent-minded and frequently made mistakes. As a consequence, he has already been summoned to his boss.

Finally, your acquaintance stayed away from work for an entire week without an excuse. Upon his return, he seemed anxious and harassed. He reports that he is now absolutely certain that people cannot only read other people's thoughts, but that they also directly influence them. He was however unsure who would steer his thoughts. He also said that, when thinking, he was continually interrupted. Frequently, he would even hear those people talk to him, and they would give him instructions. Sometimes, they would also talk to each other and make fun of whatever he was doing at the time. The situation was particularly bad at his apartment, he claimed. At home, he would really feel threatened, and would be terribly scared. Hence he had not spent the night at his place for the past week, but rather he had hidden in hotel rooms and hardly dared to go out.

### Vignette major depressive disorder

Imagine that you hear the following about an acquaintance with whom you occasionally spend your leisure time:

Within the past two months, your acquaintance has changed in his nature. As opposed to previously, he is down and sad without being able to make out a tangible reason for his feeling low. He appears serious and worried. There is nothing that will make him laugh anymore. He hardly ever talks, and if he is saying something, he is speaking in a low voice about the worries he has with regard to his future. Your acquaintance feels useless and has the impression to do everything wrong. All attempts to cheer him up have failed. He lost all interest in

things and is not motivated to do anything. He complains of often waking up in the middle of the night and not being able to get back to sleep. He feels exhausted and without energy in the morning already. He says that he encounters difficulty in concentrating on his job. In contrast with previous times, everything takes him very long. He hardly manages his workload. As a consequence, he has already been summoned to his boss.

### Mathematical equations for the PLS components

This equation describes a simple ordinary least squares age-period-cohort regression model with Y as the outcome of interest and age, period and cohort as predictors.

$$y = b_0 + b_1age + b_2period + b_3cohort$$

The components  $comp_i$  are chosen to maximize the covariance to the outcome.

$$comp_i = t_{i1}age + t_{i2}period + t_{i3}cohort$$

Thus, in a two components model the regression equation can be rewritten as:

$$y = b_0 + b_1comp_1 + b_2comp_2$$

$$y = b_0 + b_1(t_{11}age + t_{12}period + t_{13}cohort) + b_2(t_{21}age + t_{22}period + t_{23}cohort)$$

The regression coefficients can be easily assessed by rearranging this equation into:

$$y = b_0 + (b_1t_{11}b_2t_{21})age + (b_1t_{12}b_2t_{22})period + (b_1t_{13}b_2t_{23})cohort$$

Table S1. Number of subjects of each age group at each time period

| Birth Cohort           | 1990          | 2001 | 2011 | 1990                    | 2001 | 2011 |
|------------------------|---------------|------|------|-------------------------|------|------|
|                        | Psychotherapy |      |      | Psychotropic medication |      |      |
| Depression vignette    | (N=4,120)     |      |      | (N=4,034)               |      |      |
| <1930                  | 260           | 211  | 11   | 255                     | 212  | 9    |
| 1930-1939              | 189           | 361  | 69   | 194                     | 364  | 61   |
| 1940-1949              | 197           | 366  | 92   | 199                     | 372  | 82   |
| 1950-1959              | 230           | 420  | 104  | 223                     | 408  | 96   |
| 1960-1969              | 236           | 506  | 119  | 229                     | 487  | 109  |
| 1970-1979              | 56            | 363  | 84   | 54                      | 354  | 85   |
| ≥80                    | -             | 153  | 93   | -                       | 153  | 88   |
| Schizophrenia vignette | (N=4,212)     |      |      | (N=4,061)               |      |      |
| <1930                  | 282           | 216  | 15   | 265                     | 221  | 11   |
| 1930-1939              | 205           | 345  | 66   | 196                     | 327  | 63   |
| 1940-1949              | 215           | 353  | 108  | 212                     | 348  | 100  |
| 1950-1959              | 252           | 437  | 104  | 245                     | 425  | 98   |
| 1960-1969              | 297           | 503  | 108  | 281                     | 490  | 103  |
| 1970-1979              | 44            | 325  | 89   | 40                      | 320  | 80   |
| ≥1980                  | -             | 158  | 90   | -                       | 152  | 84   |

Table S2. Model fit ( $R^2$ ) for the main models logistic partial least squares analysis

| Vignette      | Item                    | 1component | 2 components | 3 components |
|---------------|-------------------------|------------|--------------|--------------|
| Depression    | Psychotherapy           | 3.7%       | 4.1%         | 4.1%         |
|               | Psychotropic medication | 3.0%       | 3.6%         | 3.7%         |
| Schizophrenia | Psychotherapy           | 4.4%       | 4.9%         | 4.9%         |
|               | Psychotropic medication | 8.2%       | 9.2%         | 9.2%         |

Table S3. Treatment recommendations towards a person with schizophrenia or depression: Age, period, and cohort effects. Logistic PLS regression with two components in the model including the “don’t know” category. Unstandardized coefficients.

| Schizophrenia      |               |                     |                         |                     |
|--------------------|---------------|---------------------|-------------------------|---------------------|
|                    | Psychotherapy |                     | Psychotropic medication |                     |
|                    | OR            | 95% CI <sup>1</sup> | OR                      | 95% CI <sup>1</sup> |
| Age (years)        | 1.004         | (1.001, 1.008)      | 1.017                   | (1.014, 1.019)      |
| Cohort (years)     | 1.008         | (1.007, 1.010)      | 1.006                   | (1.005, 1.011)      |
| Period (1990 ref.) |               |                     |                         |                     |
| 2001               | 2.944         | (2.531, 3.371)      | 3.583                   | (3.185, 4.153)      |
| 2011               | 2.001         | (1.553, 2.730)      | 2.918                   | (2.412, 3.609)      |
| R <sup>2</sup>     |               | 5.47%               |                         | 8.73%               |

  

| Depression         |               |                     |                         |                     |
|--------------------|---------------|---------------------|-------------------------|---------------------|
|                    | Psychotherapy |                     | Psychotropic medication |                     |
|                    | OR            | 95% CI <sup>1</sup> | OR                      | 95% CI <sup>1</sup> |
| Age (years)        | 1.006         | (1.003, 1.009)      | 1.009                   | (1.007, 1.012)      |
| Cohort (years)     | 1.007         | (1.006, 1.009)      | 1.002                   | (1.000, 1.004)      |
| Period (1990 ref.) |               |                     |                         |                     |
| 2001               | 2.601         | (2.277, 2.945)      | 2.627                   | (2.256, 3.070)      |
| 2011               | 2.030         | (1.569, 2.616)      | 1.629                   | (1.280, 2.122)      |
| R <sup>2</sup>     |               | 4.88%               |                         | 3.78%               |

<sup>1</sup>CI after 1,000 non parametric Bootstrap replicates

Table S4. Treatment recommendations towards a person with schizophrenia or depression: Age, period, and cohort effects. Ordinal logistic PLS regression with two components. Unstandardized coefficients.

| Schizophrenia      |               |                     |                         |                     |
|--------------------|---------------|---------------------|-------------------------|---------------------|
|                    | Psychotherapy |                     | Psychotropic medication |                     |
|                    | OR            | 95% CI <sup>1</sup> | OR                      | 95% CI <sup>1</sup> |
| Age (years)        | 1.004         | (1.001, 1.007)      | 1.014                   | (1.012, 1.016)      |
| Cohort (years)     | 1.007         | (1.006, 1.008)      | 1.006                   | (1.003, 1.008)      |
| Period (1990 ref.) |               |                     |                         |                     |
| 2001               | 2.318         | (2.027, 2.591)      | 3.263                   | (2.903, 3.659)      |
| 2011               | 1.779         | (1.448, 2.311)      | 3.123                   | (2.462, 3.695)      |

  

| Depression         |               |                     |                         |                     |
|--------------------|---------------|---------------------|-------------------------|---------------------|
|                    | Psychotherapy |                     | Psychotropic medication |                     |
|                    | OR            | 95% CI <sup>1</sup> | OR                      | 95% CI <sup>1</sup> |
| Age (years)        | 1.007         | (1.004, 1.011)      | 1.011                   | (1.009, 1.013)      |
| Cohort (years)     | 1.007         | (1.005, 1.009)      | 0.999                   | (0.997, 1.002)      |
| Period (1990 ref.) |               |                     |                         |                     |
| 2001               | 2.266         | (2.028, 2.579)      | 2.232                   | (1.988, 2.501)      |
| 2011               | 2.151         | (1.678, 2.539)      | 1.643                   | (1.347, 2.119)      |

<sup>1</sup>CI after 1,000 non parametric Bootstrap replicates

Figure S1. Histograms of age and birth cohort for all of the four main models stratified by recommendation.

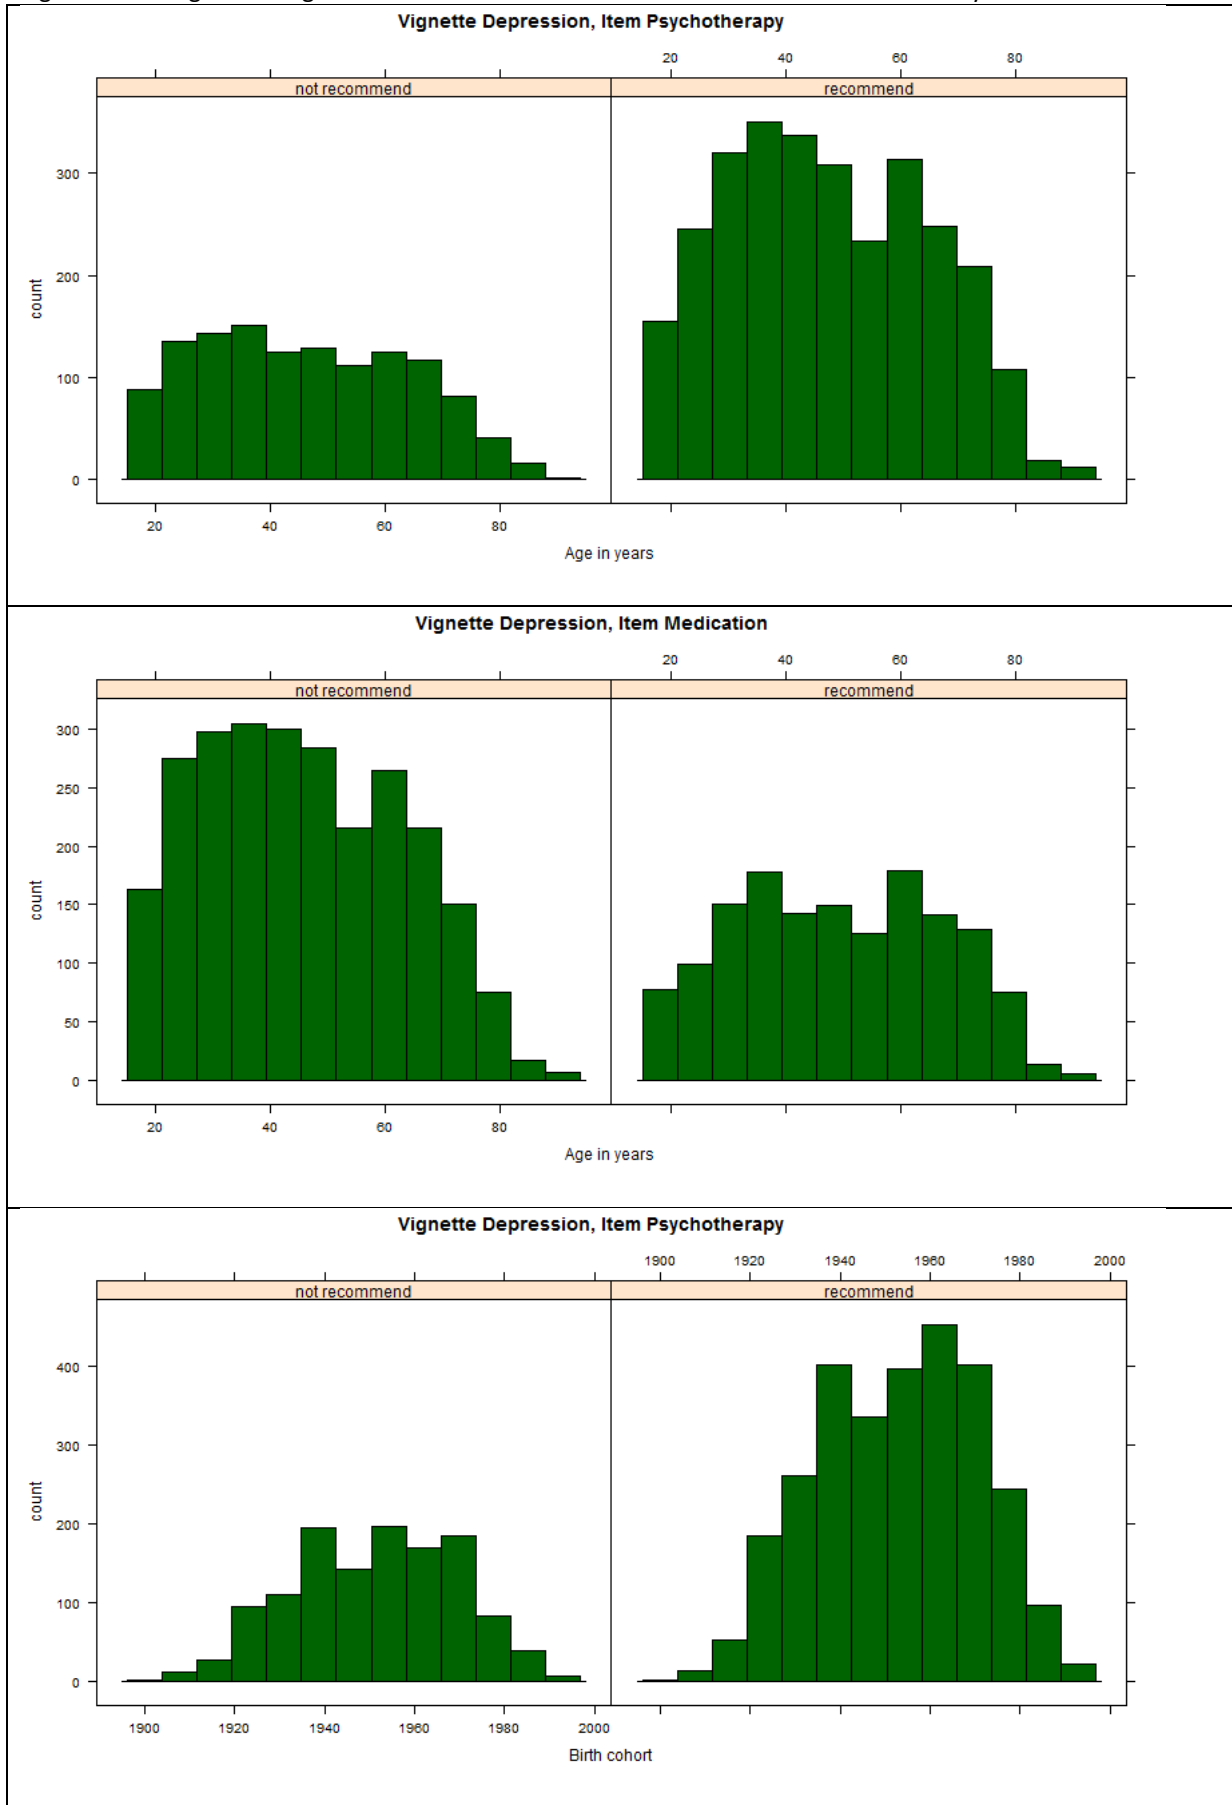

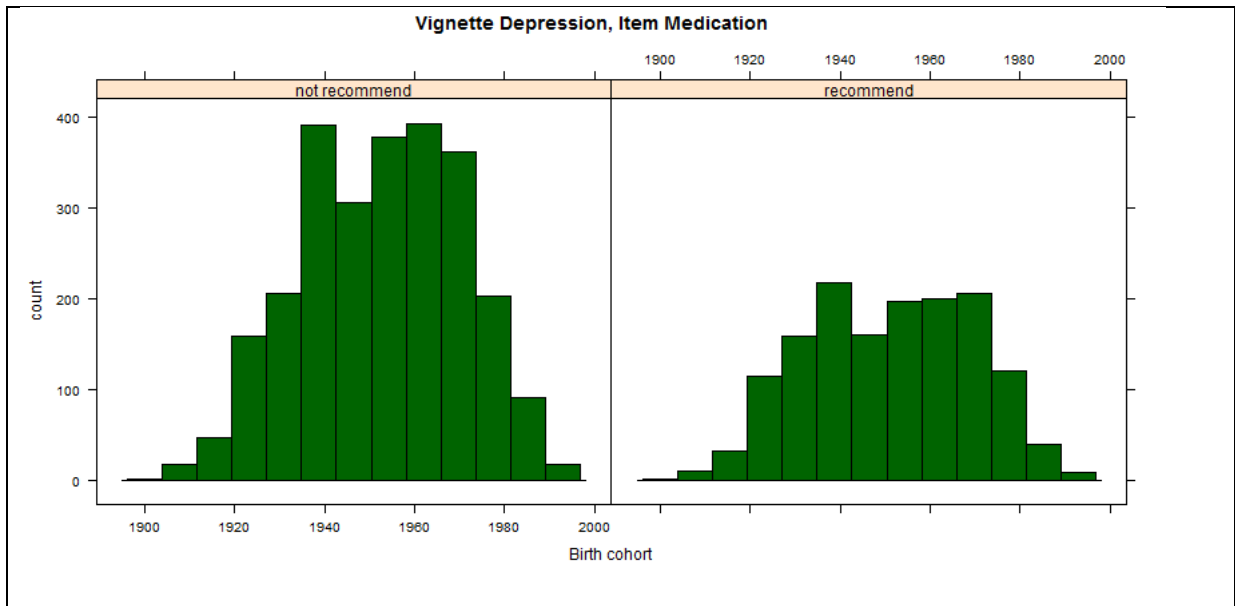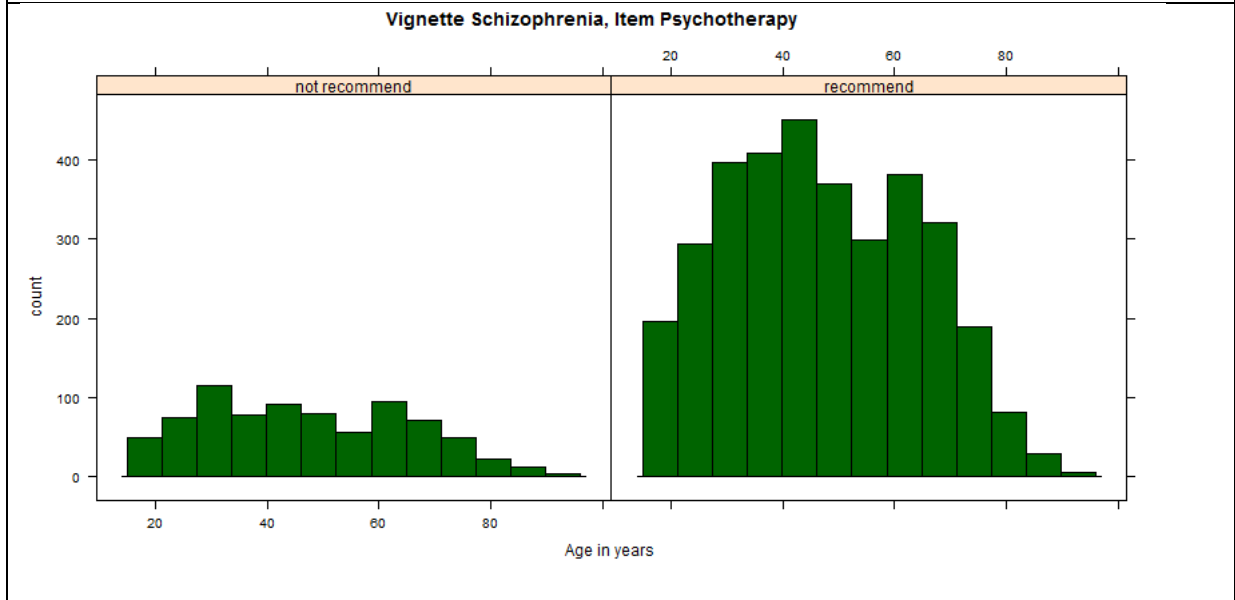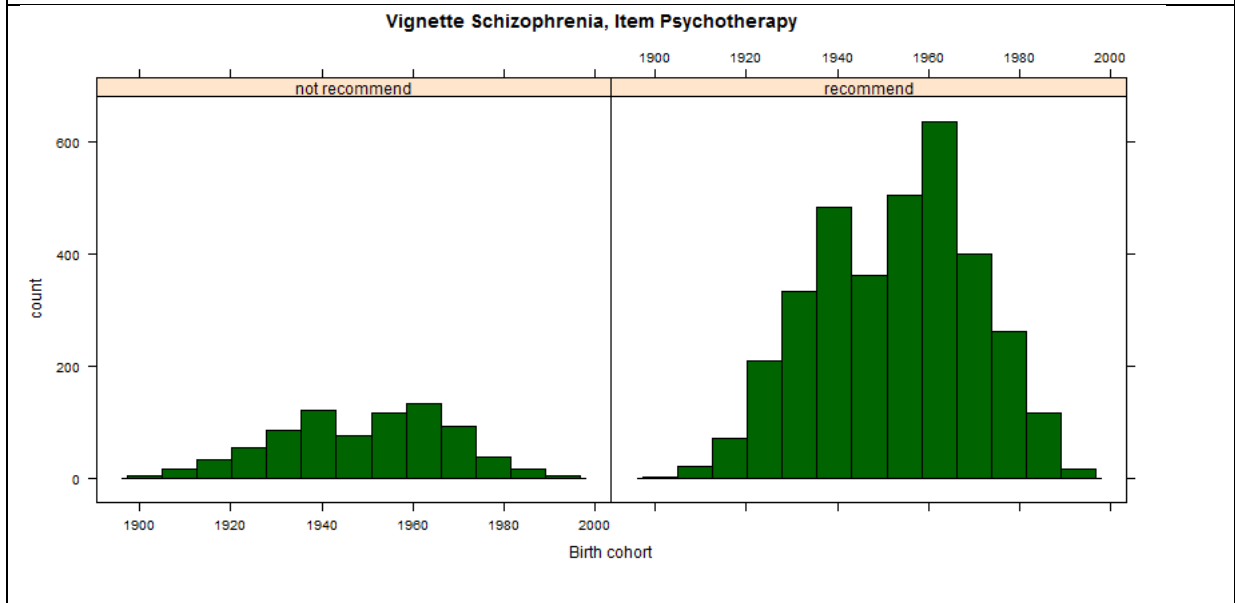

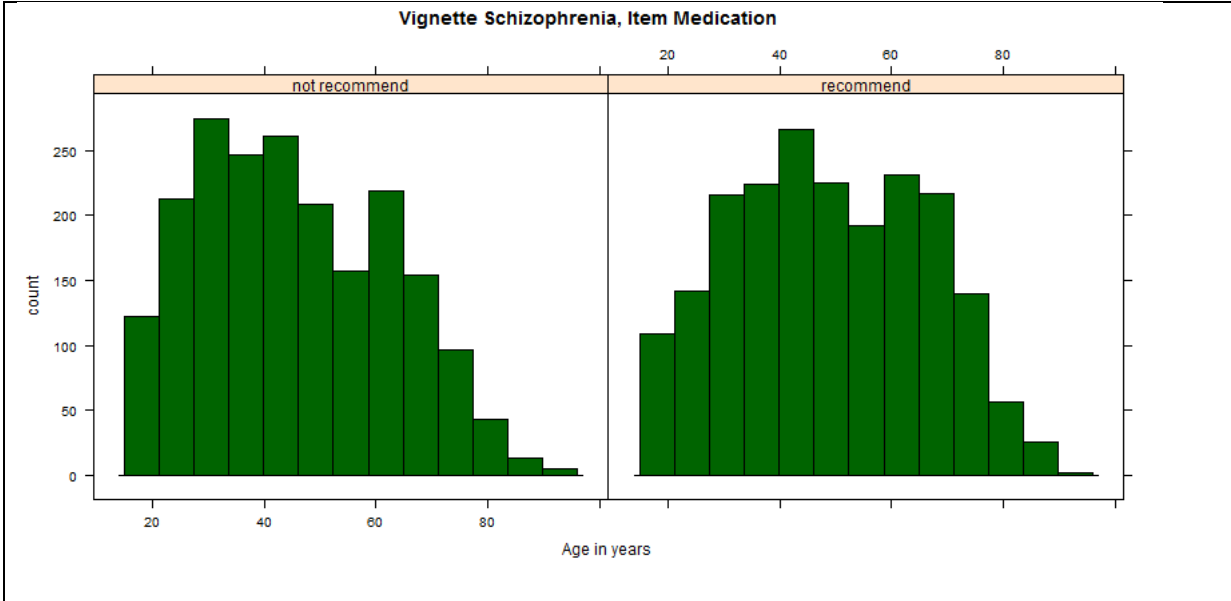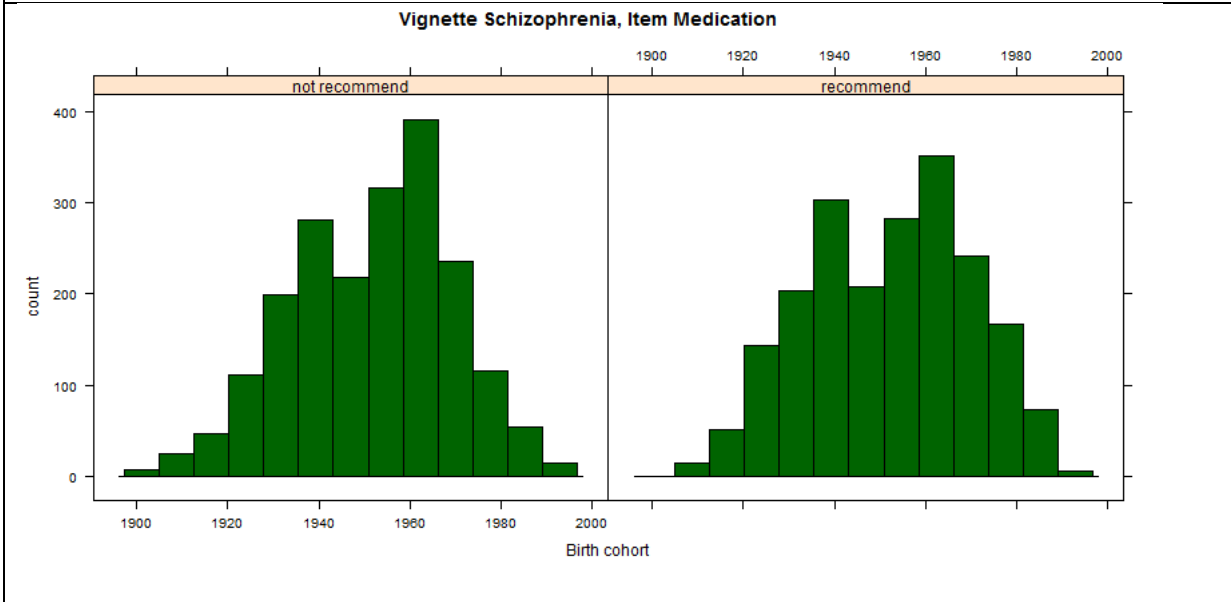

Supplement: S2045796015001134sup001.pdf [file S2045796015001134sup001.pdf]
